# Supplementary material for: Contrasting genetic architectures in different mouse reference populations used for studying complex traits
Source: PubMed Central journal article supplement — Genome Res. 2015 Jun;25(6):775–91. doi: 10.1101/gr.187450.114 (PMC4448675; doi:10.1101/gr.187450.114), 2015-06
Supplement: supp_gr.187450.114_Supplemental_References.pdf [file supp_gr.187450.114_Supplemental_References.pdf]

## Supplemental References

- Aylor DL, Valdar W, Foulds-Mathes W, Buus RJ, Verdugo RA, Baric RS, Ferris MT, Frelinger JA, Heise M, Frieman MB, et al. 2011. Genetic analysis of complex traits in the emerging collaborative cross. *Genome Res* **21**: 1213–1222.
- Bennett BJ, Farber CR, Orozco L, Min Kang H, Ghazalpour A, Siemers N, Neubauer M, Neuhaus I, Yordanova R, Guan B, et al. 2010. A high-resolution association mapping panel for the dissection of complex traits in mice. *Genome Res* **20**: 281–290.
- Bennett B, Smallwood T, Quizon P, Pomp D. 2014. Mapping metabolic traits in the diversity outbred mouse population. *FASEB J* **28**: 818.12.
- Boell L, Gregorova S, Forejt J, Tautz D. 2011. A comparative assessment of mandible shape in a consomic strain panel of the house mouse (*Mus musculus*) - implications for epistasis and evolvability of quantitative traits. *BMC Evol Biol* **11**: 309.
- Boyle AE, Gill KJ. 2008. Confirmation of provisional quantitative trait loci for voluntary alcohol consumption: genetic analysis in chromosome substitution strains and F2 crosses derived from A/J and C57BL/6J progenitors: *Pharmacogenet Genomics* **18**: 1071–1082.
- Boyle AE, Gill KJ. 2009. Genetic analysis of the psychostimulant effects of nicotine in chromosome substitution strains and F2 crosses derived from A/J and C57BL/6J progenitors. *Mamm Genome* **20**: 34–42.
- Bryant CD, Chang HP, Zhang J, Wiltshire T, Tarantino LM, Palmer AA. 2009. A major QTL on chromosome 11 influences psychostimulant and opioid sensitivity in mice. *Genes Brain Behav* **8**: 795–805.
- Church RJ, Gatti DM, Urban TJ, Long N, Yang X, Shi Q, Eaddy JS, Mosedale M, Ballard S, Churchill GA, et al. 2015. Sensitivity to hepatotoxicity due to epigallocatechin gallate is affected by genetic background in diversity outbred mice. *Food Chem Toxicol* **76**: 19–26.
- Davis RC, Nas A, Bennett B, Orozco L, Pan C, Rau CD, Eskin E, Lusis AJ. 2013. Genome-wide association mapping of blood cell traits in mice. *Mamm Genome* **24**: 105–118.
- De Mooij-van Malsen A (J. G., van Lith HA, Oppelaar H, Hendriks J, de Wit M, Kostrzewa E, Breen G, Collier DA, Olivier B, Kas MJ. 2009. Interspecies Trait Genetics Reveals Association of *Adcy8* with Mouse Avoidance Behavior and a Human Mood Disorder. *Biol Psychiatry* **66**: 1123–1130.

- Durrant C, Tayem H, Yalcin B, Cleak J, Goodstadt L, Pardo-Manuel de Villena F, Mott R, Iraqi FA. 2011. Collaborative Cross mice and their power to map host susceptibility to *Aspergillus fumigatus* infection. *Genome Res* **21**: 1239–1248.
- Farber CR, Bennett BJ, Orozco L, Zou W, Lira A, Kostem E, Kang HM, Furlotte N, Berberyan A, Ghazalpour A, et al. 2011. Mouse genome-wide association and systems genetics identify *Asxl2* as a regulator of bone mineral density and osteoclastogenesis. *PLoS Genet* **7**: e1002038.
- Ferris MT, Aylor DL, Bottomly D, Whitmore AC, Aicher LD, Bell TA, Bradel-Tretheway B, Bryan JT, Buus RJ, Gralinski LE, et al. 2013. Modeling Host Genetic Regulation of Influenza Pathogenesis in the Collaborative Cross ed. L.J. Sigal. *PLoS Pathog* **9**: e1003196.
- Foulds Mathes W, Aylor DL, Miller DR, Churchill GA, Chesler EJ, de Villena FP-M, Threadgill DW, Pomp D. 2011. Architecture of energy balance traits in emerging lines of the Collaborative Cross. *AJP Endocrinol Metab* **300**: E1124–E1134.
- French JE, Gatti DM, Morgan DL, Kissling GE, Shockley KR, Knudsen GA, Shepard KG, Price HC, King D, Witt KL, et al. 2015. Diversity Outbred Mice Identify Population-Based Exposure Thresholds and Genetic Factors that Influence Benzene-Induced Genotoxicity. *Environ Health Perspect* **123**: 237–245.
- Gelegen C, Pjetri E, Campbell IC, Collier DA, Oppelaar H, Kas MJH. 2010. Chromosomal mapping of excessive physical activity in mice in response to a restricted feeding schedule. *Eur Neuropsychopharmacol* **20**: 317–326.
- Ghazalpour A, Bennett BJ, Shih D, Che N, Orozco L, Pan C, Hagopian R, He A, Kayne P, Yang W -p., et al. 2014. Genetic regulation of mouse liver metabolite levels. *Mol Syst Biol* **10**: 730–730.
- Govoni KE, Donahue LR, Marden C, Mohan S. 2008. Complex genetic regulation of bone mineral density and insulin-like growth factor-I in C57BL/6J-Chr #A/J/NaJ chromosome substitution strains. *Physiol Genomics* **35**: 159–164.
- Hartiala J, Bennett BJ, Tang WHW, Wang Z, Stewart AFR, Roberts R, McPherson R, CARDIoGRAM Consortium, Lusk AJ, Hazen SL, et al. 2014. Comparative Genome-Wide Association Studies in Mice and Humans for Trimethylamine N-Oxide, a Proatherogenic Metabolite of Choline and L-Carnitine. *Arterioscler Thromb Vasc Biol* **34**: 1307–1313.
- Hessel EVS, Van Gassen KLI, Wolterink-Donselaar IG, Stienen PJ, Fernandes C, Brakkee JH, Kas MJH, De Graan PNE. 2009. Phenotyping mouse chromosome substitution strains reveal multiple QTLs for febrile seizure susceptibility. *Genes Brain Behav* **8**: 248–255.

- Hoover-Plow J, Shchurin A, Hart E, Sha J, Hill AE, Singer JB, Nadeau JH. 2006. Genetic background determines response to hemostasis and thrombosis. *BMC Blood Disord* **6**: 6.
- Ishii A, Koide T, Takahashi A, Shiroishi T, Hettinger TP, Frank ME, Savoy LD, Formaker BK, Yertutanol S, Lionikas A, et al. 2011. B6-MSM Consomic Mouse Strains Reveal Multiple Loci for Genetic Variation in Sucrose Octaacetate Aversion. *Behav Genet* **41**: 716–723.
- Johnsen AK, Valdar W, Golden L, Ortiz-Lopez A, Hitzemann R, Flint J, Mathis D, Benoist C. 2011. Genome-wide and species-wide dissection of the genetics of arthritis severity in heterogeneous stock mice. *Arthritis Rheum* **63**: 2630–2640.
- Kas MJH, de Mooij-van Malsen JG, de Krom M, van Gassen KLI, van Lith HA, Olivier B, Oppelaar H, Hendriks J, de Wit M, Groot Koerkamp MJA, et al. 2009. High-resolution genetic mapping of mammalian motor activity levels in mice. *Genes Brain Behav* **8**: 13–22.
- Kelada SNP, Aylor DL, Peck BCE, Ryan JF, Tavarez U, Buus RJ, Miller DR, Chesler EJ, Threadgill DW, Churchill GA, et al. 2012. Genetic Analysis of Hematological Parameters in Incipient Lines of the Collaborative Cross. *G3 GenesGenomesGenetics* **2**: 157–165.
- Kelada SNP, Carpenter DE, Aylor DL, Chines P, Rutledge H, Chesler EJ, Churchill GA, Pardo-Manuel de Villena F, Schwartz DA, Collins FS. 2014. Integrative Genetic Analysis of Allergic Inflammation in the Murine Lung. *Am J Respir Cell Mol Biol* **51**: 436–445.
- Kostrzewa E, Brandys MK, van Lith HA, Kas MJH. 2015. A candidate syntenic genetic locus is associated with voluntary exercise levels in mice and humans. *Behav Brain Res* **276**: 8–16.
- Krewson TD, Supelak PJ, Hill AE, Singer JB, Lander ES, Nadeau JH, Palmert MR. 2004. Chromosomes 6 and 13 Harbor Genes that Regulate Pubertal Timing in Mouse Chromosome Substitution Strains. *Endocrinology* **145**: 4447–4451.
- Laarakker MC, Ohl F, Lith HA. 2008. Chromosomal Assignment of Quantitative Trait Loci Influencing Modified Hole Board Behavior in Laboratory Mice using Consomic Strains, with Special Reference to Anxiety-related Behavior and Mouse Chromosome 19. *Behav Genet* **38**: 159–184.
- Leussis MP, Frayne ML, Saito M, Berry EM, Aldinger KA, Rockwell GN, Hammer RP, Baskin-Hill AE, Singer JB, Nadeau JH, et al. 2009. Genomic survey of prepulse inhibition in mouse chromosome substitution strains. *Genes Brain Behav* **8**: 806–16.

- Logan RW, Robledo RF, Recla JM, Philip VM, Bubier JA, Jay JJ, Harwood C, Wilcox T, Gatti DM, Bult CJ, et al. 2013. High-precision genetic mapping of behavioral traits in the diversity outbred mouse population: Genetic mapping of behavioral traits in the outbred mouse. *Genes Brain Behav* **12**: 424–437.
- Mustafi D, Maeda T, Kohno H, Nadeau JH, Palczewski K. 2012. Inflammatory priming predisposes mice to age-related retinal degeneration. *J Clin Invest* **122**: 2989–3001.
- Nishi A, Ishii A, Takahashi A, Shiroishi T, Koide T. 2010. QTL analysis of measures of mouse home-cage activity using B6/MSM consomic strains. *Mamm Genome* **21**: 477–485.
- Park CC, Gale GD, de Jong S, Ghazalpour A, Bennett BJ, Farber CR, Langfelder P, Lin A, Khan AH, Eskin E, et al. 2011. Gene networks associated with conditional fear in mice identified using a systems genetics approach. *BMC Syst Biol* **5**: 43.
- Parks BW, Nam E, Org E, Kostem E, Norheim F, Hui ST, Pan C, Civelek M, Rau CD, Bennett BJ, et al. 2013. Genetic Control of Obesity and Gut Microbiota Composition in Response to High-Fat, High-Sucrose Diet in Mice. *Cell Metab* **17**: 141–152.
- Philip VM, Sokoloff G, Ackert-Bicknell CL, Striz M, Branstetter L, Beckmann MA, Spence JS, Jackson BL, Galloway LD, Barker P, et al. 2011. Genetic analysis in the Collaborative Cross breeding population. *Genome Res* **21**: 1223–1238.
- Phillippi J, Xie Y, Miller DR, Bell TA, Zhang Z, Lenarcic AB, Aylor DL, Krovi SH, Threadgill DW, Pardo-Manuel de Villena F, et al. 2014. Using the emerging Collaborative Cross to probe the immune system. *Genes Immun* **15**: 38–46.
- Rau CD, Wang J, Avetisyan R, Romay MC, Martin L, Ren S, Wang Y, Lusis AJ. 2015. Mapping genetic contributions to cardiac pathology induced by Beta-adrenergic stimulation in mice. *Circ Cardiovasc Genet* **8**: 40–49.
- Recla JM, Robledo RF, Gatti DM, Bult CJ, Churchill GA, Chesler EJ. 2014. Precise genetic mapping and integrative bioinformatics in Diversity Outbred mice reveals Hydin as a novel pain gene. *Mamm Genome* **25**: 211–222.
- Rogers MS, Adini I, McBride AF, Birsner AE, D'Amato RJ. 2013. The albino mutation of tyrosinase alters ocular angiogenic responsiveness. *Angiogenesis* **16**: 639–646.
- Rutledge H, Aylor DL, Carpenter DE, Peck BC, Chines P, Ostrowski LE, Chesler EJ, Churchill GA, Pardo-Manuel de Villena F, Kelada SNP. 2014. Genetic Regulation of Zfp30, CXCL1, and Neutrophilic Inflammation in Mouse Lung. *Genetics* **198**: 735–745.

- Singer JB, Hill AE, Burrage LC, Olszens KR, Song J, Justice M, O'Brien WE, Conti DV, Witte JS, Lander ES, et al. 2004. Genetic dissection of complex traits with chromosome substitution strains of mice. *Science* **304**: 445–448.
- Singer JB, Hill AE, Nadeau JH, Lander ES. 2005. Mapping Quantitative Trait Loci for Anxiety in Chromosome Substitution Strains of Mice. *Genetics* **169**: 855–862.
- Smallwood TL, Gatti DM, Quizon P, Weinstock GM, Jung K-C, Zhao L, Hua K, Pomp D, Bennett BJ. 2014. High-resolution genetic mapping in the diversity outbred mouse population identifies apobec1 as a candidate gene for atherosclerosis. *G3 GenesGenomesGenetics* **4**: 2353–2363.
- Smolock EM, Ilyushkina IA, Ghazalpour A, Gerloff J, Murashev AN, Lusk AJ, Korshunov VA. 2012. Genetic locus on mouse chromosome 7 controls elevated heart rate. *Physiol Genomics* **44**: 689–698.
- Spiezio SH, Amon LM, McMillen TS, Vick CM, Houston BA, Caldwell M, Ogimoto K, Morton GJ, Kirk EA, Schwartz MW, et al. 2014. Genetic determinants of atherosclerosis, obesity, and energy balance in consomic mice. *Mamm Genome Off J Int Mamm Genome Soc* **25**: 549–563.
- Stylianou IM, Tsai S-W, DiPetrillo K, Ishimori N, Li R, Paigen B, Churchill G. 2006. Complex Genetic Architecture Revealed by Analysis of High-Density Lipoprotein Cholesterol in Chromosome Substitution Strains and F2 Crosses. *Genetics* **174**: 999–1007.
- Svenson KL, Gatti DM, Valdar W, Welsh CE, Cheng R, Chesler EJ, Palmer AA, McMillan L, Churchill GA. 2012. High-Resolution Genetic Mapping Using the Mouse Diversity Outbred Population. *Genetics* **190**: 437–447.
- Takada T, Mita A, Maeno A, Sakai T, Shitara H, Kikkawa Y, Moriwaki K, Yonekawa H, Shiroishi T. 2008. Mouse inter-subspecific consomic strains for genetic dissection of quantitative complex traits. *Genome Res* **18**: 500–508.
- Takahashi A, Nishi A, Ishii A, Shiroishi T, Koide T. 2008a. Systematic analysis of emotionality in consomic mouse strains established from C57BL/6J and wild-derived MSM/Ms. *Genes Brain Behav* **7**: 849–858.
- Takahashi A, Shiroishi T, Koide T. 2008b. Multigenic factors associated with a hydrocephalus-like phenotype found in inter-subspecific consomic mouse strains. *Mamm Genome* **19**: 333–338.
- Takahashi A, Tomihara K, Shiroishi T, Koide T. 2010. Genetic Mapping of Social Interaction Behavior in B6/MSM Consomic Mouse Strains. *Behav Genet* **40**: 366–376.

- Thaisz J, Tsaih S-W, Feng M, Philip VM, Zhang Y, Yanas L, Sheehan S, Xu L, Miller DR, Paigen B, et al. 2012. Genetic analysis of albuminuria in collaborative cross and multiple mouse intercross populations. *AJP Ren Physiol* **303**: F972–F981.
- Valdar W, Solberg LC, Gauguier D, Burnett S, Klenerman P, Cookson WO, Taylor MS, Rawlins JNP, Mott R, Flint J. 2006. Genome-wide genetic association of complex traits in heterogeneous stock mice. *Nat Genet* **38**: 879–887.
- Vered K, Durrant C, Mott R, Iraqi FA. 2014. Susceptibility to klebsiella pneumoniae infection in collaborative cross mice is a complex trait controlled by at least three loci acting at different time points. *BMC Genomics* **15**: 865.
- Winawer MR, Kuperman R, Niethammer M, Sherman S, Rabinowitz D, Guell IP, Ponder CA, Palmer AA. 2007. Use of chromosome substitution strains to identify seizure susceptibility loci in mice. *Mamm Genome* **18**: 23–31.
- Zhang W, Korstanje R, Thaisz J, Staedtler F, Harttman N, Xu L, Feng M, Yanas L, Yang H, Valdar W, et al. 2012. Genome-Wide Association Mapping of Quantitative Traits in Outbred Mice. *G3 GenesGenomesGenetics* **2**: 167–174.
