# Supplementary material for: Contrasting genetic architectures in different mouse reference populations used for studying complex traits
Source: HighWire-hosted journal article supplement (doi:10.1101/gr.187450.114), 2015-05-07
Supplement: Supplemental_Table_1.xlsx [file Supplemental_Table_1.xlsx]

## Sheet: Sheet1
Supplemental Table 1. QTL mapping results for OS, HMDP, CC, and CSS
Panel		Number of traits	Number of QTLs total	Number of QTLs per trait	Number of mice used in study	Number of QTLs per trait per mouse	% traits with no QTLS	% traits with one or two QTLS	% traits with 3 or more QTLs	Number of QTLs per multigenic trait	Average Effect Size (QTLs reported / QTLs total)	Sex	Reference
OS	HS	101	843	8.34653	1904	4.38368	4	6	90	9.27778	2.5% (all reported)	M and F	Valdar et al 2006
	HS	1	8	8	570	14.0351	0	0	100	8	N.R.	M and F	Johnsen et al 2011
	CO	5	2	0.4	288	1.38889	80	20	0	N.A.	N.R.	M	Zhang et al 2012
	DO	113	11	0.0973451	141	0.690391	90	10	0	N.A.	10.0% (1/2)	M and F	Svenson et al 2012
	DO	38	5	0.131579	283	0.464943	87	13	0	N.A.	12.3% (all reported)	M and F	Logan et al 2013
	DO	2	1	0.5	316	1.58228	50	50	0	N.A.	N.R.	M and F	Bennett et al 2014
	DO	1	0	0	283	0	100	0	0	N.A.	No QTLs	M and F	Recla et al 2014
	DO	9	3	0.333333	292	1.14155	66	33	0	N.A.	N.R.	F	Smallwood et al 2014
	DO	1	1	1	272	3.67647	0	100	0	N.A.	N.R.	M	Church et al 2015
	DO	2	2	1	144	6.94444	0	100	0	N.A.	48.7% (all reported)	M	French et al 2015
	Total:	271
			Average:	2.08987		3.04037	0.53	0.257778	0.211111	8.63889	0.18375
HMDP		4	17	4.25	706	6.01983	0	25	75	5	N.R.	M	Bennett et al 2010
		3	5	1.66667	879	1.89609	0	67	33	3	N.R.	M	Farber et al 2011
		48	27	0.5625	700	0.803571	71	23	6	4.33333	N.R.	M	Park et al 2011
		1	0	0	322	0	100	0	0	N.A.	No QTLs	M	Smolock et al 2012
		10	39	3.9	706	5.52408	0	40	60	5.66667	N.R.	M	Davis et al 2013
		9	11	1.22222	731	1.67199	67	22	11	8	N.R.	M	Parks et al 2013
		283	240	0.848057	127	6.67761	58	32	10	4.58621	26.0% (all reported)	M	Ghazalpour et al 2014
		1	1	1	N.R.	Unknown	0	100	0	N.A.	N.R.	M	Hartiala et al 2014
		6	7	1.16667	748	1.55971	17	66	17	3	N.R.	F	Rau et al 2015
	Total:	365
			Average:	1.62401		3.2276	0.347778	0.416667	23%	4.79803	0.26
CC		2	2	1	184	5.43478	0	100	0	N.A.	18.6% (1/2)	M	Aylor et al 2011
		1	7	7	371	18.8679	0	0	100	7	14.2% (all reported)	M and F	Durrant et al 2011
		15	5	0.333333	176	1.89394	73	27	0	N.A.	17.3% (2/5)	M	Fould-Mathes et al 2011
		102	8	0.0784314	N.R.	Unknown	92	8	0	N.A.	10.5% (all reported)	M and F	Philip et al 2011
		9	5	0.555556	131	4.24088	56	44	0	N.A.	49% (1/5 reported)	M	Kelada et al 2012
		1	1	1	190	5.26316	0	100	0	N.A.	N.R.	M	Thaisz et al 2012
		18	9	0.5	155	3.22581	56	44	0	N.A.	27.0% (3/9)	F	Ferris et al 2013
		3	2	0.666667	151	4.41501	33	67	0	N.A.	22.5% (all reported)	M	Kelada et al 2014
		21	9	0.428571	66	6.49351	62	38	0	N.A.	N.R.	M	Phillippi et al 2014
		2	2	1	151	6.62252	0	100	0	N.A.	N.R.	M	Rutledge et al 2014
		2	3	1.5	328	4.57317	0	100	0	N.A.	N.R.	M and F	Vered et al 2014
	Total:	176
			Average:	1.27841		6.10307	0.338182	0.570909	0.0909091	7	0.227286
CSS		1	2	2	295	6.77966	0	100	0	N.A.	N.R.	F	Krewson et al 2004
		29	121	4.17241	225	18.5441	14	28	58	6.64706	N.R.	M	Singer et al 2004
		24	70	2.91667	210	13.8889	38	25	37	6.66667	N.R.	F	"
		7	12	1.71429	~231	8	29	29	42	3.33333	N.R.	M	Singer et al 2005
		2	8	4	N.R.	Unknown	0	50	50	8	N.R.	Unknown	Hoover-Plow et al 2006
		1	10	10	~198	50.5	0	0	100	10	N.R.	M	Stylianou et al 2006
		1	12	12	~198	60.6	0	0	100	12	N.R.	F	"
		1	2	2	413	4.84262	0	100	0	N.A.	N.R.	M	Winawer et al 2007
		1	4	4	440	9.09091	0	0	100	4	N.R.	M and F	Boyle and Gill 2008
		4	18	4.5	N.R.	Unknown	0	25	75	5.66667	N.R.	M	Govoni et al 2008
		4	15	3.75	N.R.	Unknown	0	25	75	4.66667	N.R.	F	"
		48	37	0.770833	153	5.03813	67	21	12	3.66667	N.R.	M	Laarakker et al 2008
		47	271	5.76596	387	14.8991	9	23	68	7.875	N.R.	M	Takada et al 2008
		46	201	4.36957	365	11.9714	9	30	61	6.46429	N.R.	F	"
		35	117	3.34286	350	9.55102	17	17	66	4.73913	N.R.	M	Takahashi et al 2008a
		1	6	6	7884	0.761035	0	0	100	6	N.R.	M and F	Takahashi et al 2008b
		35	154	4.4	326	13.4969	8	26	66	6.13043	N.R.	F	"
		1	8	8	456	17.5439	0	0	100	8	N.R.	M and F	Boyle and Gill 2009
		4	22	5.5	520	10.5769	0	0	100	5.5	15.4% (all reported)	M and F	Bryant et al 2009
		6	29	4.83333	208	23.2372	0	33	67	6.5	N.R.	M	de Mooij-van Malsen et al 2009
		6	15	2.5	208	12.0192	17	33	50	4.33333	N.R.	F	"
		2	8	4	441	9.07029	0	50	50	6	N.R.	M and F	Hessel et al 2009
		1	3	3	297	10.101	0	0	100	3	N.R.	F	Kas et al 2009
		2	12	6	592	10.1351	0	0	100	6	N.R.	M	Leussis et al 2009
		3	8	2.66667	302	8.83002	33	0	67	4	N.R.	F	Gelegen et al 2010
		7	51	7.28571	355	20.5231	0	0	100	7.28571	N.R.	M	Nishi et al 2010
		1	4	4	497	8.04829	0	0	100	4	N.R.	M and F	Takahashi et al 2010
		4	15	3.75	262	14.313	0	25	75	4.66667	N.R.	M	"
		1	3	3	235	12.766	0	0	100	3	N.R.	F	"
		1	21	21	498	42.1687	0	0	100	21	N.R.	M and F	Boell et all 2011
		3	6	2	199	10.0503	33	33	34	4	N.R.	M	Ishii et al 2011
		2	0	0	N.R.	0	100	0	0	N.A.	No QTLs	Unknown	Mustafi et al 2012
		1	7	7	N.R.	Unknown	0	0	100	7	N.R.	Unknown	Rogers et al 2013
		24	211	8.79167	194	45.3179	0	4	96	9.13043	N.R.	M	Spiezio et al 2014
		11	86	7.81818	191	40.9329	0	27	73	10.125	N.R.	F	"
		1	3	3	293	10.2389	0	0	100	3	N.R.	F	Kostrzewa et al 2015
	Total:	367
			Average:	5.0528		16.8902	0.106857	0.201143	0.692	6.54366	0.15
HS, Heterogeneous stocks. DO, Diversity Outbred. CO, Commercially Available Outbred
CC, Collaborative Cross; OS, Outbred Stock; HMDP, Hybrid Mouse Diversity Panel; CSS, Chromosome Substitution Strain
N.R. = Not reported, N.A. = Not applicable
